# Supplementary material for: Phosphoproteomics identifies microglial Siglec‐F inflammatory response during neurodegeneration
Source: PubMed Central journal article supplement (PMC7722784; doi:10.15252/msb.20209819), 2020-12-08
Supplement: MSB-16-e9819-s001.pdf [file MSB-16-e9819-s001.pdf]

## Expanded View Figures

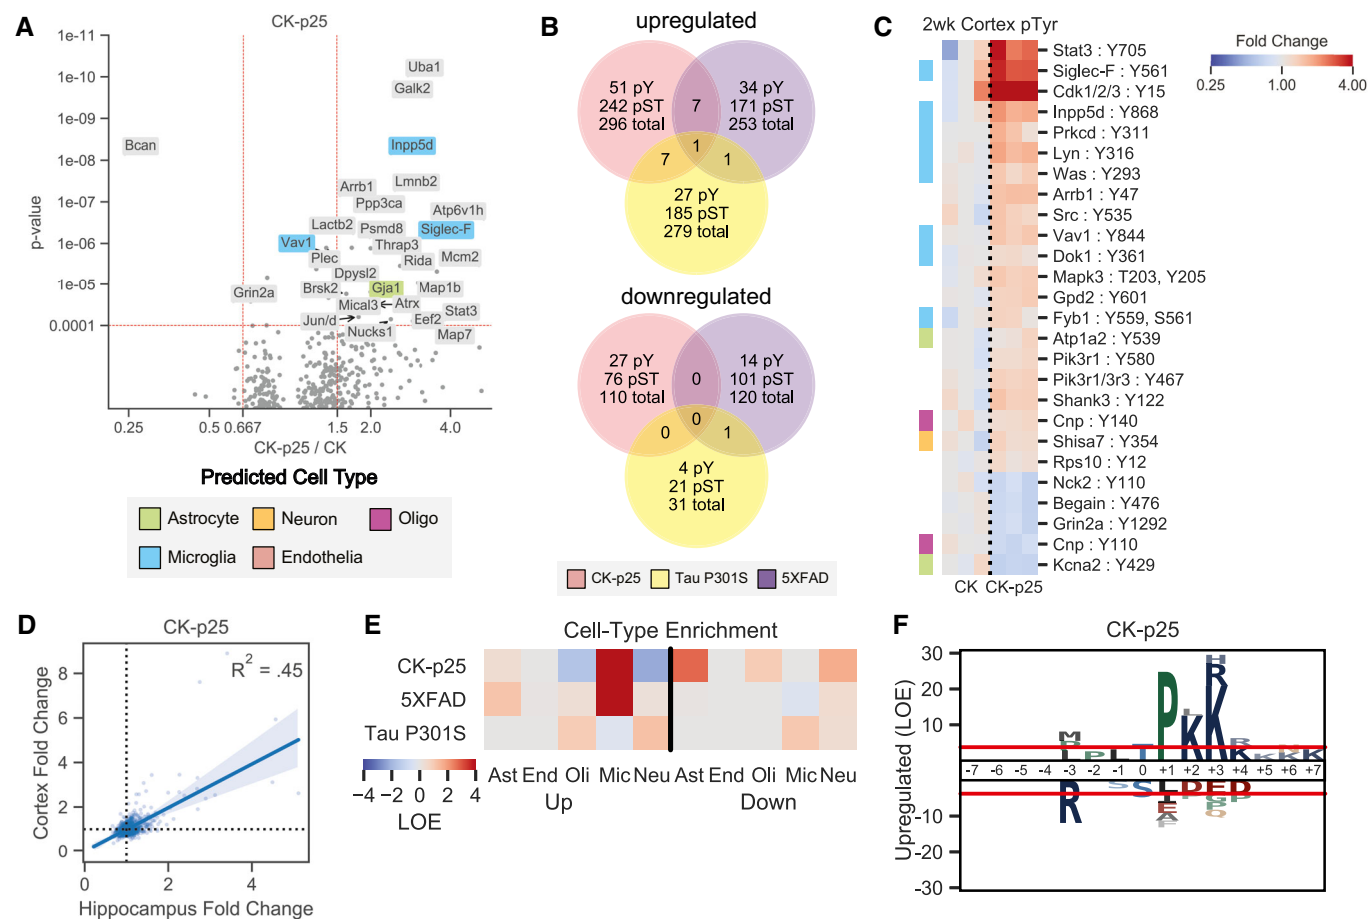

**Figure EV1. CK-p25 phosphoproteome accessory analyses.**

- A Volcano plots showing changed phosphopeptides in CK-p25 mice. All tissues and time points are considered together for fold change and  $P$ -value calculations. Protein names are shown for changed peptides. Labels are only shown for peptides with maximum directional change for each protein. Labels are colored by predicted cell-type specific protein. Green = Astrocyte, Orange = Neuron, Blue = Microglia, Purple = Oligodendrocyte, Salmon = Endothelia.
- B Unique and overlapping peptides that are upregulated (FC > 1.25,  $P$  < 1e-2) or downregulated (FC < .8,  $P$  < 1e-2) within each mouse model. Venn colors are: Red = CK-p25, Purple = 5XFAD, Yellow = Tau P301S.
- C Heatmap showing phosphotyrosine peptides from the cortex of CK-p25 animals. Colors indicate fold change relative to control animals on a log2-scale. Row colors (left) indicate peptides from predicted cell-type specific proteins using the same scheme as (A).
- D Correlation between phosphopeptide fold changes in the hippocampus and cortex of 2wk CK-p25 mice. Linear regression  $R^2$  value is shown on plot.
- E Cell-type enrichment analysis of phosphopeptides from CK-p25, 5XFAD, and Tau animals. Heatmap colors indicate LOE of cell-type specific proteins in the set of upregulated or downregulated phosphopeptides for each animal. Cell types are: Ast = Astrocyte; End = Endothelia; Oli = Oligodendrocyte, Mic = Microglia, Neu = Neuron.
- F Phosphorylation motif logos for enriched peptides from the upregulated (FC > 1.25,  $P$  < 1e-2) pSer/pThr phosphoproteome of CK-p25 mice. Y-axis shows log-odds enrichment (LOE) of amino acids proximal to phosphorylation sites.

**Figure EV2. 5XFAD and Tau P301S phosphoproteome accessory analyses.**

- A Volcano plots showing changed phosphopeptides in 5XFAD animals. All tissues and time points are considered together for fold change and *P*-value calculations. Protein names are shown for changed peptides. Labels are only shown for peptides with maximum directional change from each protein. Labels are colored by predicted cell-type specific protein. Orange = Neuron, Blue = Microglia, Salmon = Endothelia.
- B Quantification of transgenic amyloid precursor protein peptides identified in the hippocampus and cortex from 5XFAD and WT mice: HFEHVR and LVFFAEDVGSNK. APP / App indicates peptides mapped to both transgenic and native protein. NTF: N-terminal Fragment, A $\beta_{n-m}$ : peptide mapped within A $\beta$ .
- C Heatmap showing enriched phosphotyrosine peptides in the cortex of 9 mo 5XFAD mice. Colors indicate fold change relative to control animals on a log<sub>2</sub>-scale. Row colors (left) indicate peptides from predicted cell-type specific proteins using the same scheme as (A).
- D Correlation between phosphopeptide fold changes in the hippocampus and cortex of 9mo 5XFAD mice. Linear regression  $R^2$  value is shown on plot.
- E Phosphorylation motif logos for enriched peptides from the downregulated (FC < .8, *P* < 1e-2) pSer/pThr phosphoproteome of 5XFAD mice. Y-axis shows log-odds enrichment (LOE) of amino acids proximal to phosphorylation sites.
- F Phosphopeptides associated with  $\Delta p35KI$  mutation in 5XFAD mice. Heatmap colors indicate log<sub>2</sub> fold changes from hippocampus tissue. Row colors (left) indicate the number of residue positions for which peptides match the CaMKII motif: O.+Q.xO -, where 'O' indicates hydrophobic residues (FLMVI), '+' indicates positively charged residues (KR), 'x' indicates a phosphosite, and '.' indicates any residue. 'x' and '.' are uncounted for motif scores.
- G Volcano plots showing changed phosphopeptides in Tau P301S mice. All tissues and time points are considered together for fold change and *P*-value calculations. Protein names are shown for changed peptides. Labels are only shown for peptides with maximum directional change from each protein. Labels are colored by predicted cell-type specific protein. Orange = Neuron, Blue = Microglia.
- H Heatmap showing enriched phosphotyrosine peptides in Tau P301S 4mo hippocampus tissues. Colors indicate fold change relative to control animals on a log<sub>2</sub>-scale. Row colors (left) indicate peptides from predicted cell-type specific proteins using the same scheme as (A).
- I Transgenic MAPT peptides identified in Tau P301S mice. Colored bars indicate directional changes for non-phosphorylated peptides. Red = increased, blue = decreased, grey = unchanged, light-grey = only phosphopeptides were seen in that region. Colored circles indicate phosphorylation sites that were quantified. Red circle = increased, blue circle = decreased, black circle = unchanged.
- J Correlation between phosphopeptide fold changes in hippocampus tissues of 4mo and 6mo Tau P301S mice. Linear regression  $R^2$  value is shown on plot.

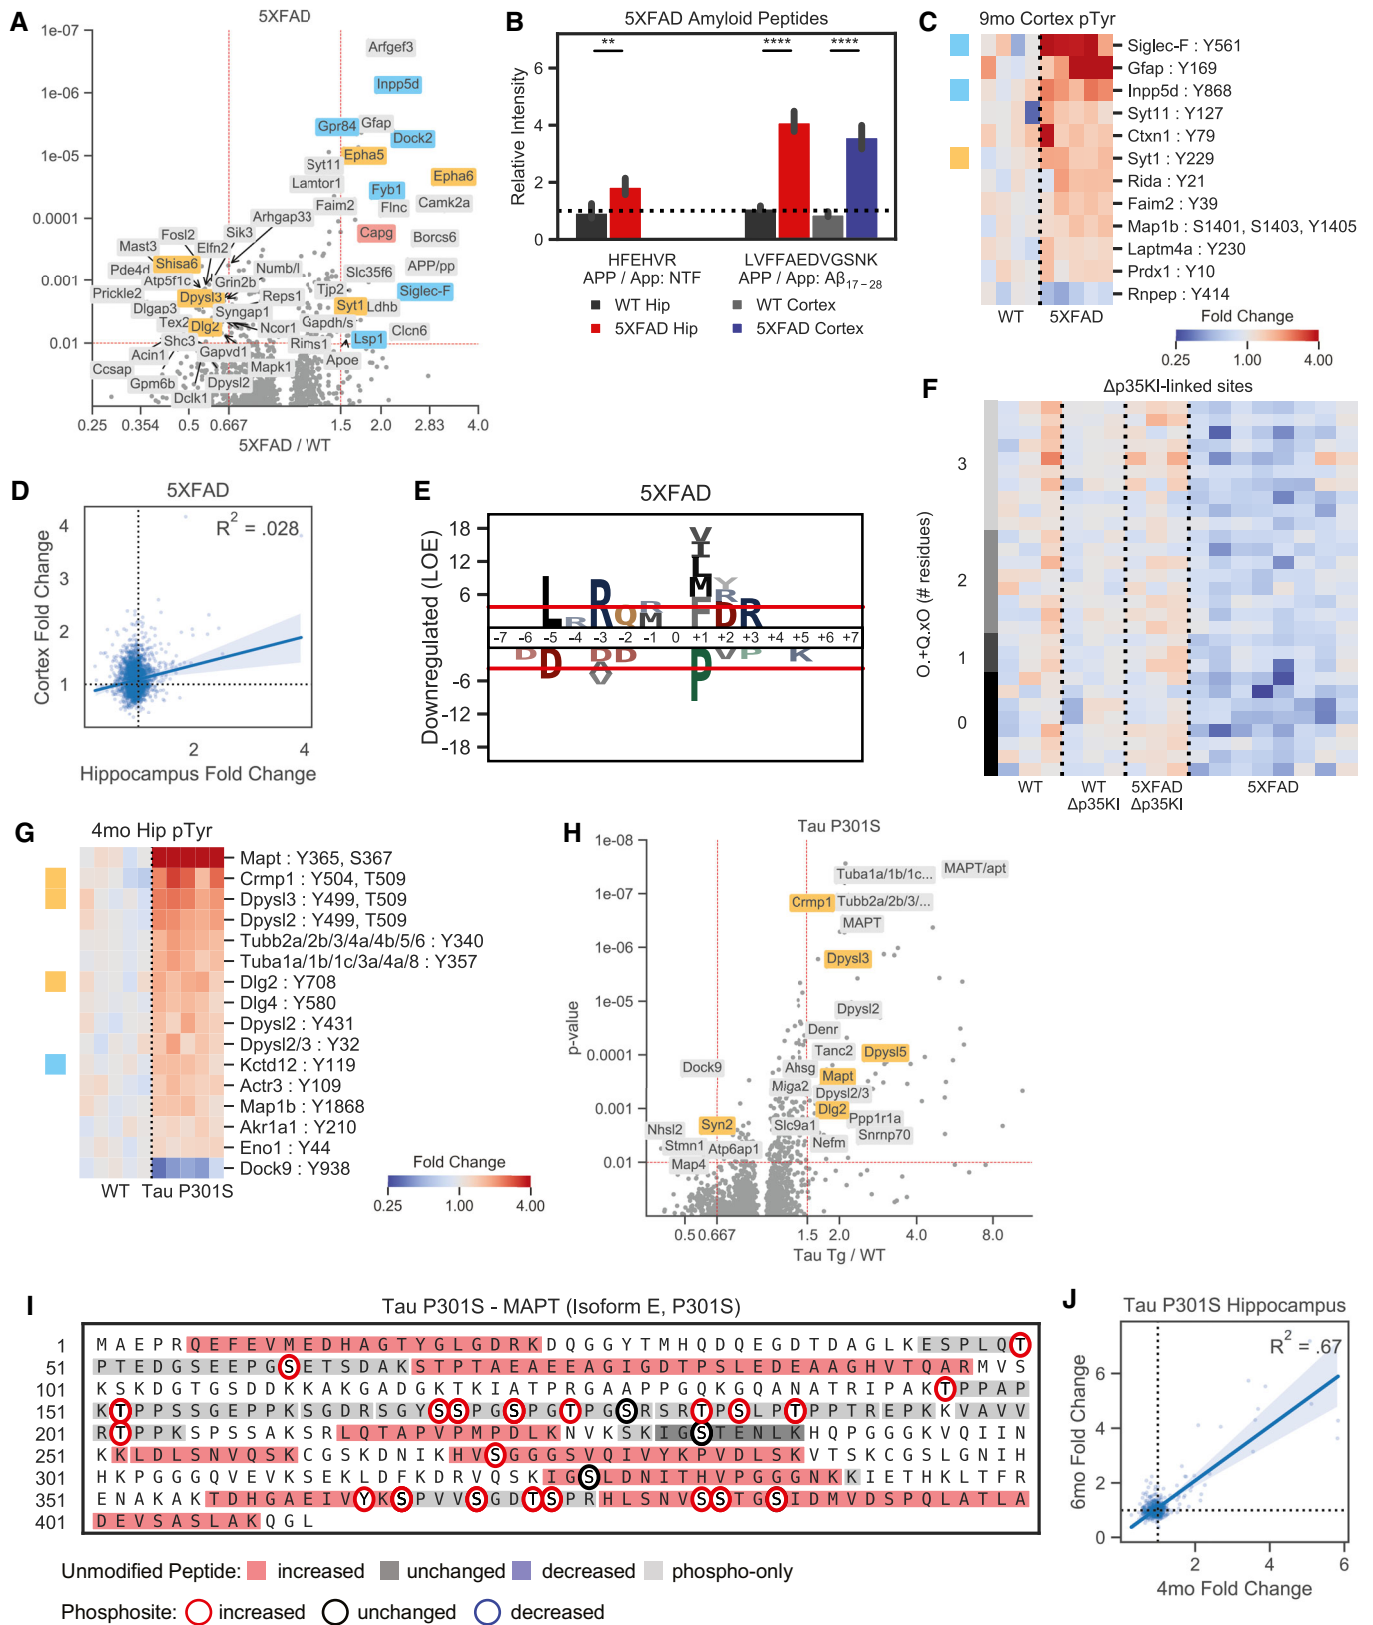

Figure EV2.

**Figure EV3. Pathway analysis and peptide validation.**

A–C Top 25 enriched gene ontologies from the phosphoproteome of (A) CK-p25 mice, (B) 5XFAD mice, and (C) Tau P301S mice.

D, E Validated peptide-spectrum matches for (D) Siglec-F pY561 (SVyTEIK) and (E) Inpp5d pY868 (LyDFVK) in CK-p25 mice. Green circles indicate predicted fragment ions. Red circles indicate abundant peaks that were not assigned a fragment ion. Orange box indicate precursor isolation window.

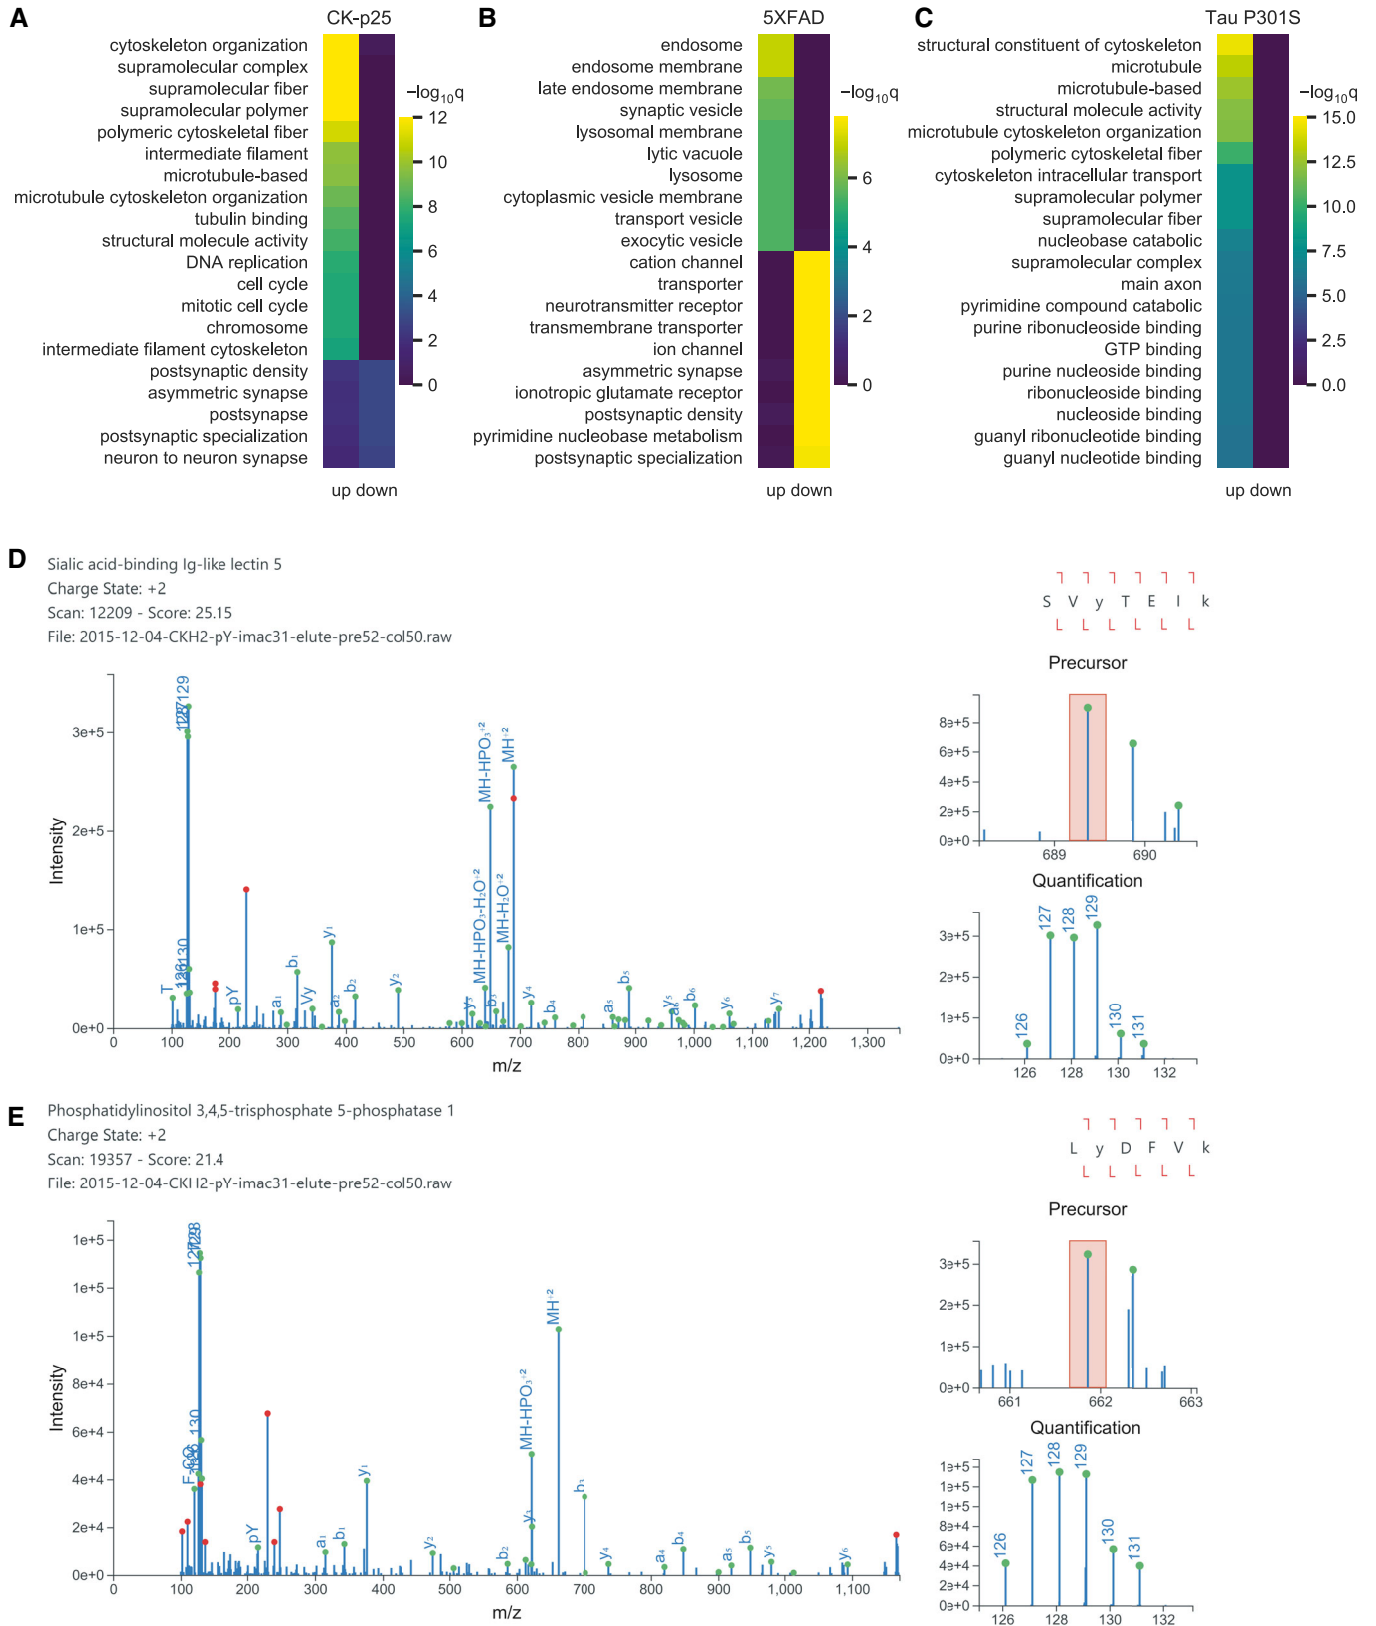

Figure EV3.

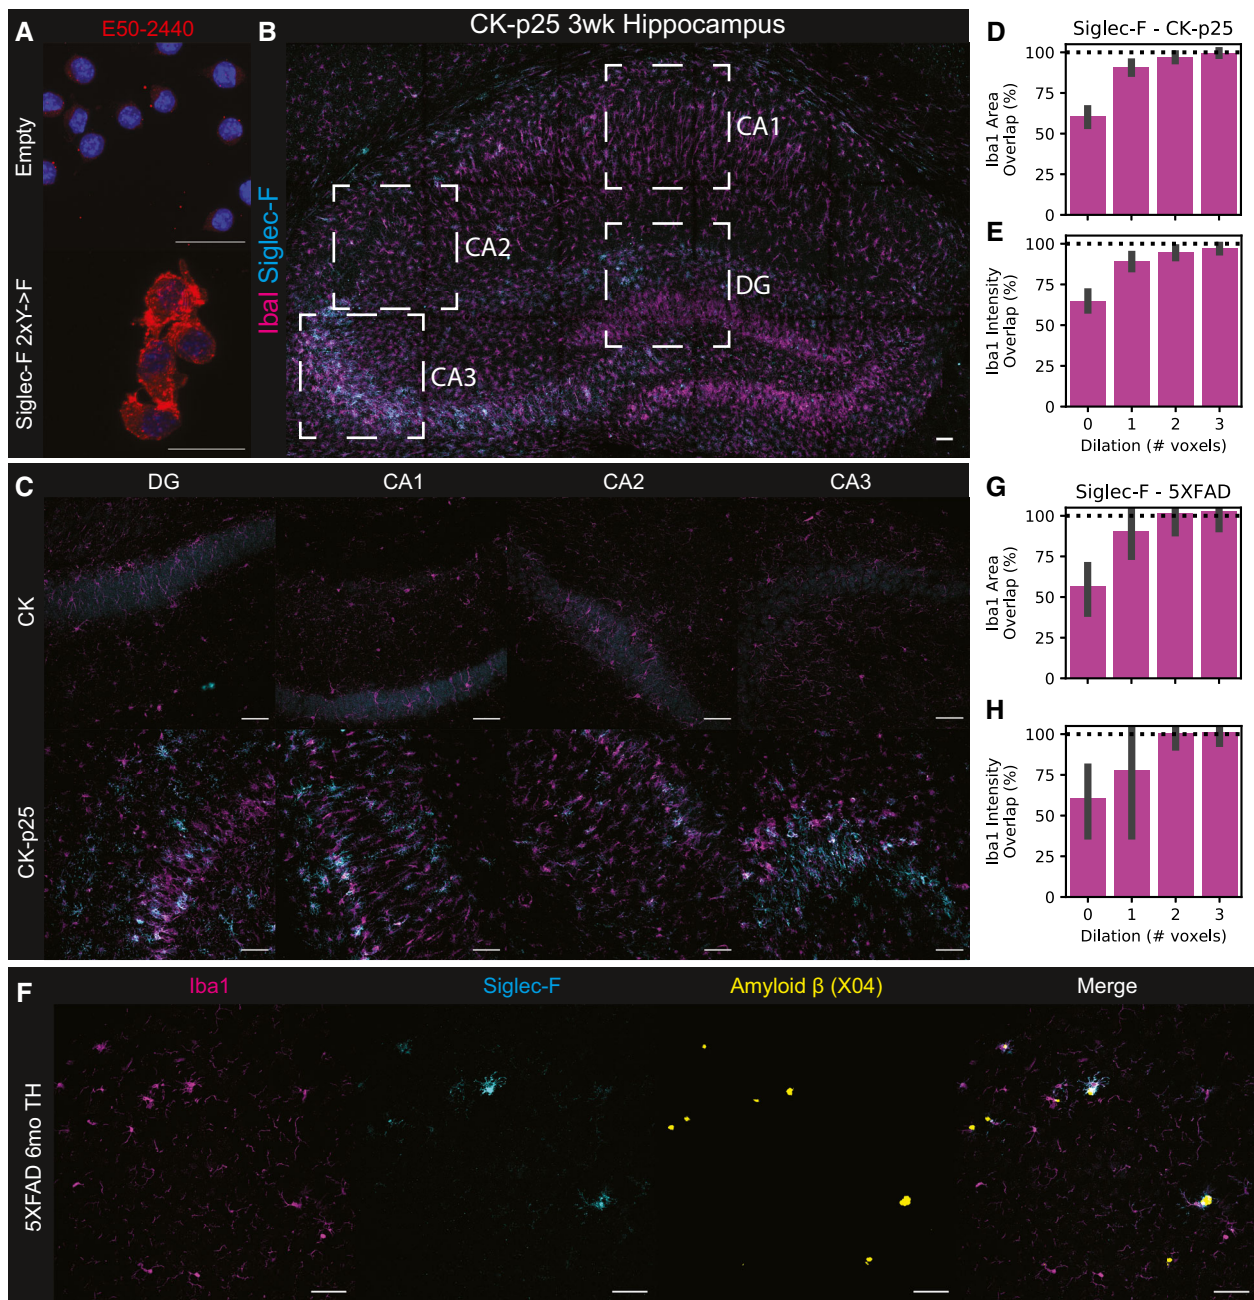

**Figure EV4. Siglec-F IF antibody validation and regional scanning.**

- A Validation of E50-2440 antibody on BV-2 with stable Siglec-F expression. Top: Empty vector; Bottom: Siglec-F 2xY->F. Blue = 33342, Red = E50-2440. Scale bars = 20  $\mu$ m.
- B Immunofluorescence (IF) staining showing Siglec-F and Iba1 localization in CK-p25 3wk hippocampus tile scan view. Boxed regions indicate analyzed regions: DG, CA1, CA2, and CA3. Scale bars = 50  $\mu$ m. Colors are: Magenta = Iba1, Cyan = Siglec-F. Images are max z-stack projections taken from coronal slices.
- C Individual wide-field images of DG, CA1, CA2, and CA3 regions from CK (top) and CK-p25 mice (bottom).
- D, E Percent of total Siglec-F mask (D) area and (E) signal intensity that overlaps with Iba1 masks that have been dilated by a variable number of pixels.  $\circ$  indicates Iba1 mask was dilated prior to Boolean overlap calculation. 1 voxel  $\cong$  2.4  $\mu$ m. Values are calculated from CA1, CA2, CA3, and DG image regions from CK-p25 animals using the same image set as Figure 1C.
- F Wide-field image of Siglec-F, Iba1, and A $\beta$  (Methoxy X04) signal across in the thalamus (TH) of 6 m.o. 5XFAD mice.
- G, H Percent of total Siglec-F mask (G) area and (H) signal intensity that overlaps with Iba1 masks that have been dilated by a variable number of pixels. Legend is same as (D-E). Values are calculated from thalamic, cortical, and hippocampal regions from 5XFAD animals using the same image set as Figure 2F.

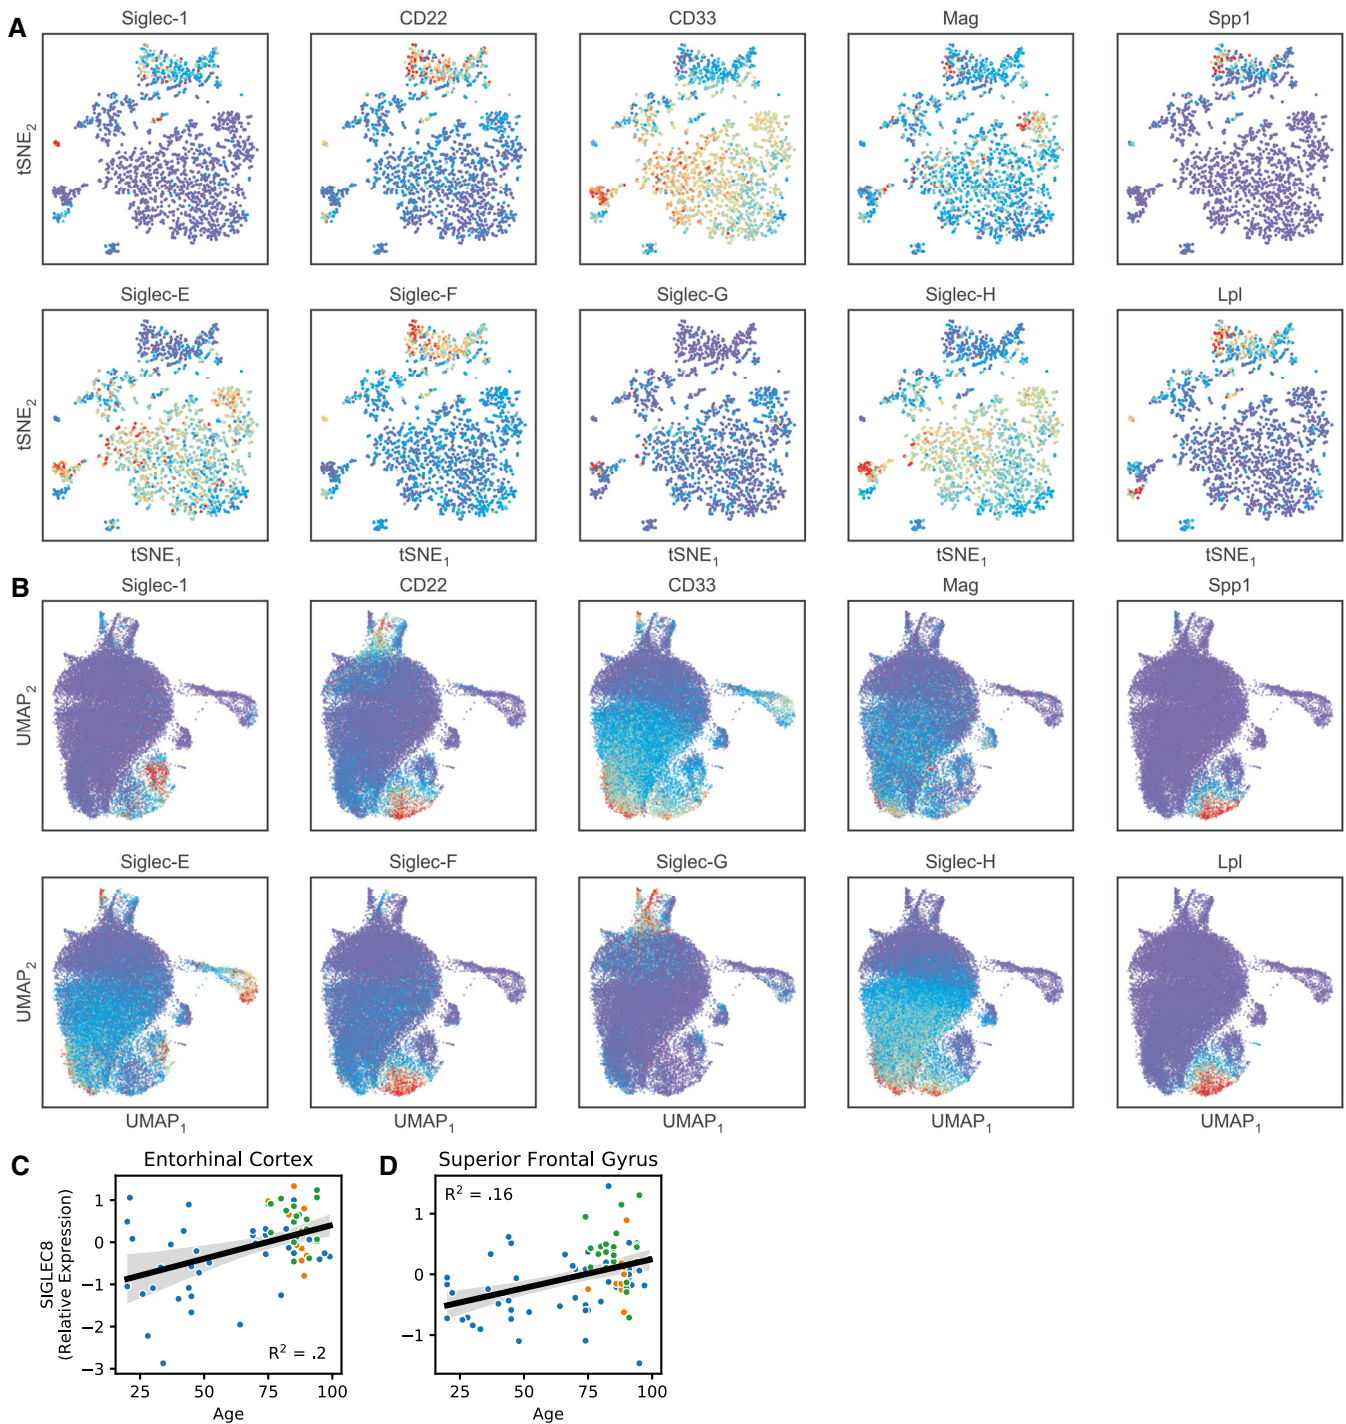

**Figure EV5. Siglec expression patterns in microglial scRNA-Seq and bulk RNA-seq datasets.**

- A** Reanalysis of Siglec expression patterns in CK-p25 microglia. Expression levels were imputed using MAGIC and plotted using the tSNE coordinates from the original publication. Late response MHC-II<sup>+</sup> microglia (top cluster, marker genes: Spp1, Lpl) show increased Siglec-F expression compared with homeostatic microglia (lower right cluster).
- B** Reanalysis of Siglec expression patterns in 5XFAD microglia. Expression levels were projected onto two dimensions using UMAP and imputed using MAGIC. Disease-associated microglia (lower center, marker genes: Spp1, Lpl) show increased Siglec-F expression compared with homeostatic microglia (center).
- C, D** Relative RNA abundances for Siglec-8 in (C) entorhinal cortex and (D) superior frontal gyrus post-mortem patient tissue. Blue = ND; Yellow = MCI; Green = AD. Linear regression  $R^2$  and  $P$ -values are shown on plots.

**Figure EV6. Siglec-8 IF antibody validation and accessory analyses.**

- A IF staining for Siglec-5 (top) and Siglec-8 (bottom) in late-onset AD patient tissue (LOAD; Case ID: 03-06). Shown are merge (Left; Red = Iba1, Green = Siglec, Blue = 488 background autofluorescence), background-corrected merge (Middle; Red = Iba1, Green = Siglec / 488 background), and background-corrected Siglec alone (Right). Scale bars = 50  $\mu\text{m}$ .
- B Antibody validation of ab198690 on BV-2 with induced Siglec-8 (48 h dox). Top: Siglec-8; Bottom: Siglec-8 2xY->F. Blue = Hoechst 33342, Red = ab198690. Scale bar = 20  $\mu\text{m}$ .
- C–E Representative IF images for Iba1, Siglec-8, MHC-II, and A $\beta$  (Methoxy X04) in tissue from patients. Shown are: (C) white matter (WM) region of a LOAD patient (Case ID: 01-43); (D) grey matter (GM) region from a LOAD patient (Case ID: 03-06); and (E) GM region from an early-onset AD patient (Case ID: 00-22).
- F, G Percent of total Siglec-8 mask (F) area and (G) signal intensity that overlaps with Iba1, MHC, and the union (U) of Iba1 and MHC.  $\circ$  indicates mask were dilated in by a given number of pixels prior to Boolean overlap calculation. 1 voxel  $\sim$  2.4  $\mu\text{m}$ . Values are median stack values from  $n = 3$  selected 20x wide-field images.
- H Percent area coverage of Siglec-8 localized to Iba1 or MHC in grey matter (GM) and white matter (WM) across all analyzed images.
- I Percent area coverage of Siglec-8 localized to Iba1 compared to total A $\beta$  volume in each field of view across all analyzed images. Linear regression  $R^2$  value is shown for images with  $\geq 10 \mu\text{m}^2$  total amyloid volume.



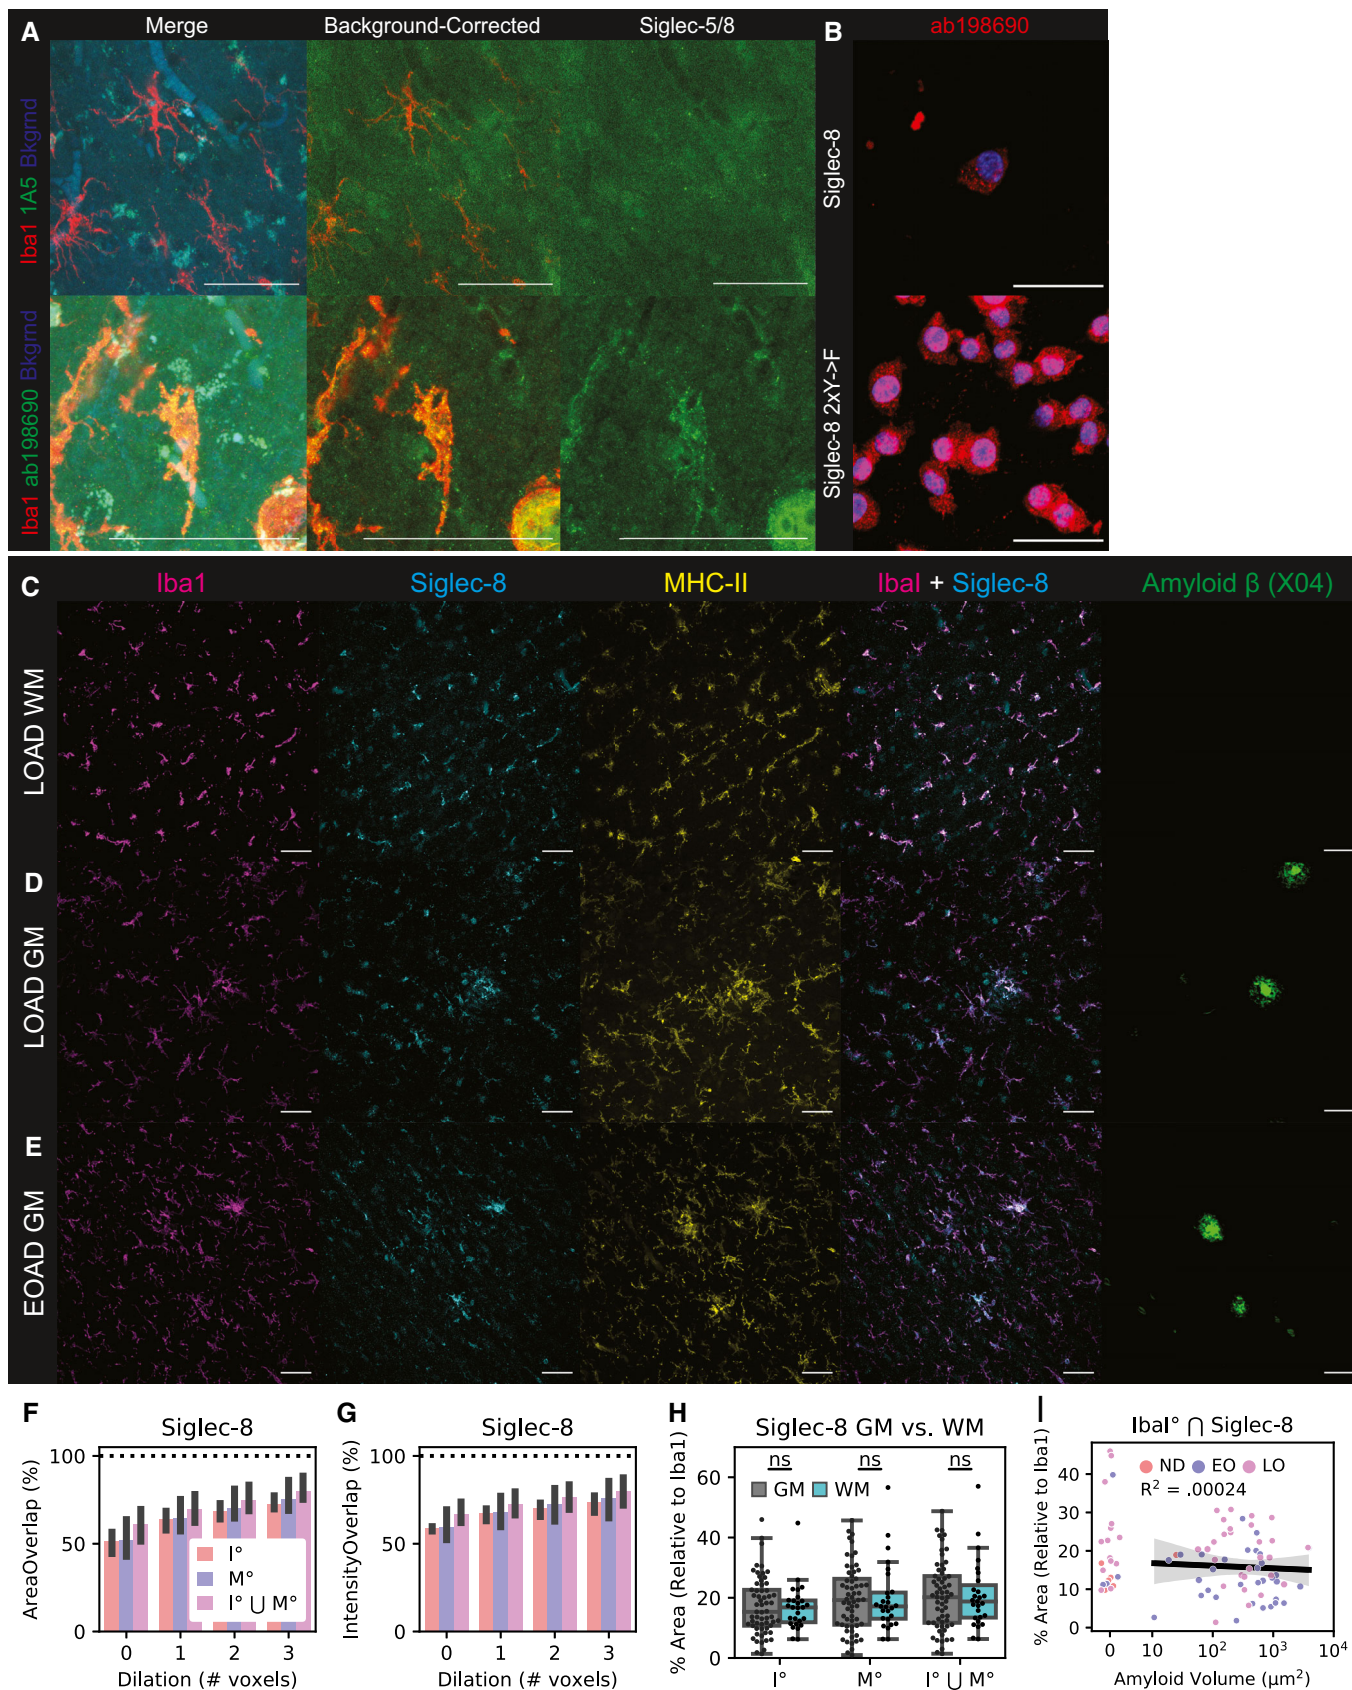

Figure EV6.

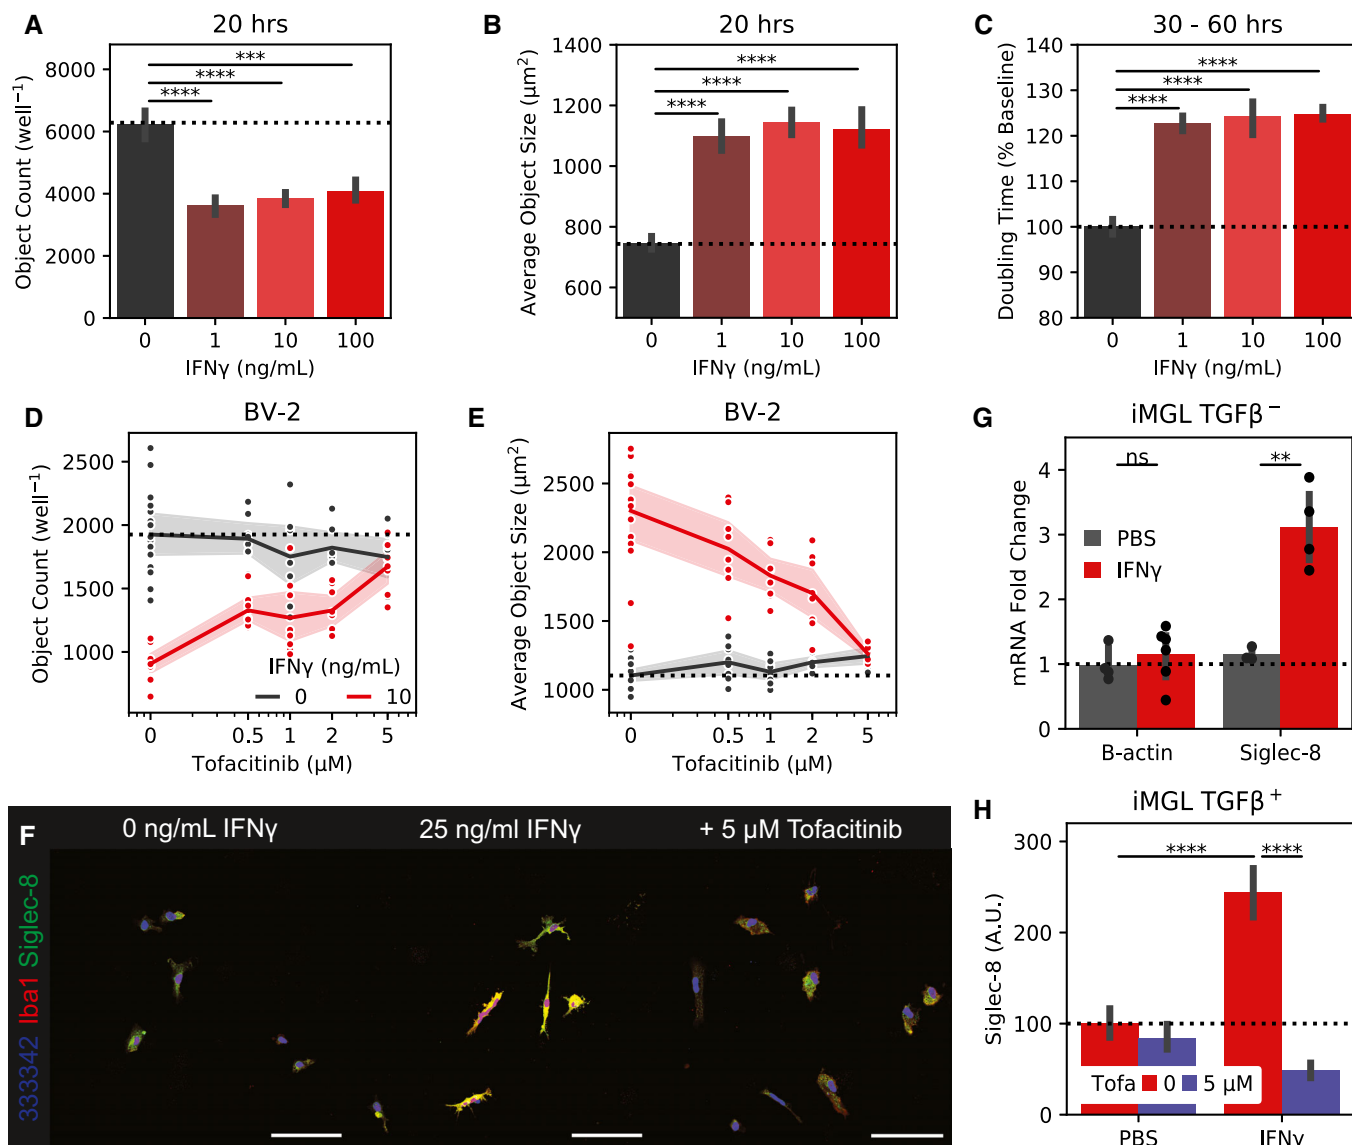

**Figure EV7. BV-2 and iMGL IFN $\gamma$  and tofacitinib accessory experiments.**

A-C Incucyte (A) object count, (B) object size, and (C) doubling time for BV-2 cells treated with 1–100 ng/ml IFN $\gamma$ . (A+B) are calculated at 20 h while (C) is calculated from confluency changes between 30 and 60 h.

D, E Incucyte (D) object count and (E) object size for BV-2 cells co-treated with 10 ng/ml IFN $\gamma$  and 0–5  $\mu\text{M}$  tofacitinib.

F 20x wide-field images of iMGLs treated with IFN $\gamma$  or PBS and tofacitinib. Siglec-8 fluorescence is only shown on non-nuclear regions. Colors are: Red = Iba1, Green = Siglec-8, Blue = Hoechst 33342. Scale bars = 100  $\mu\text{m}$ .

G qPCR quantification of Siglec-8 from iMGLs treated with 25 ng/ml IFN $\gamma$  or PBS.

H Quantification of Siglec-8 on iMGLs treated with IFN $\gamma$  or PBS and tofacitinib. iMGLs were matured with TGF $\beta$  before IFN $\gamma$  stimulation.

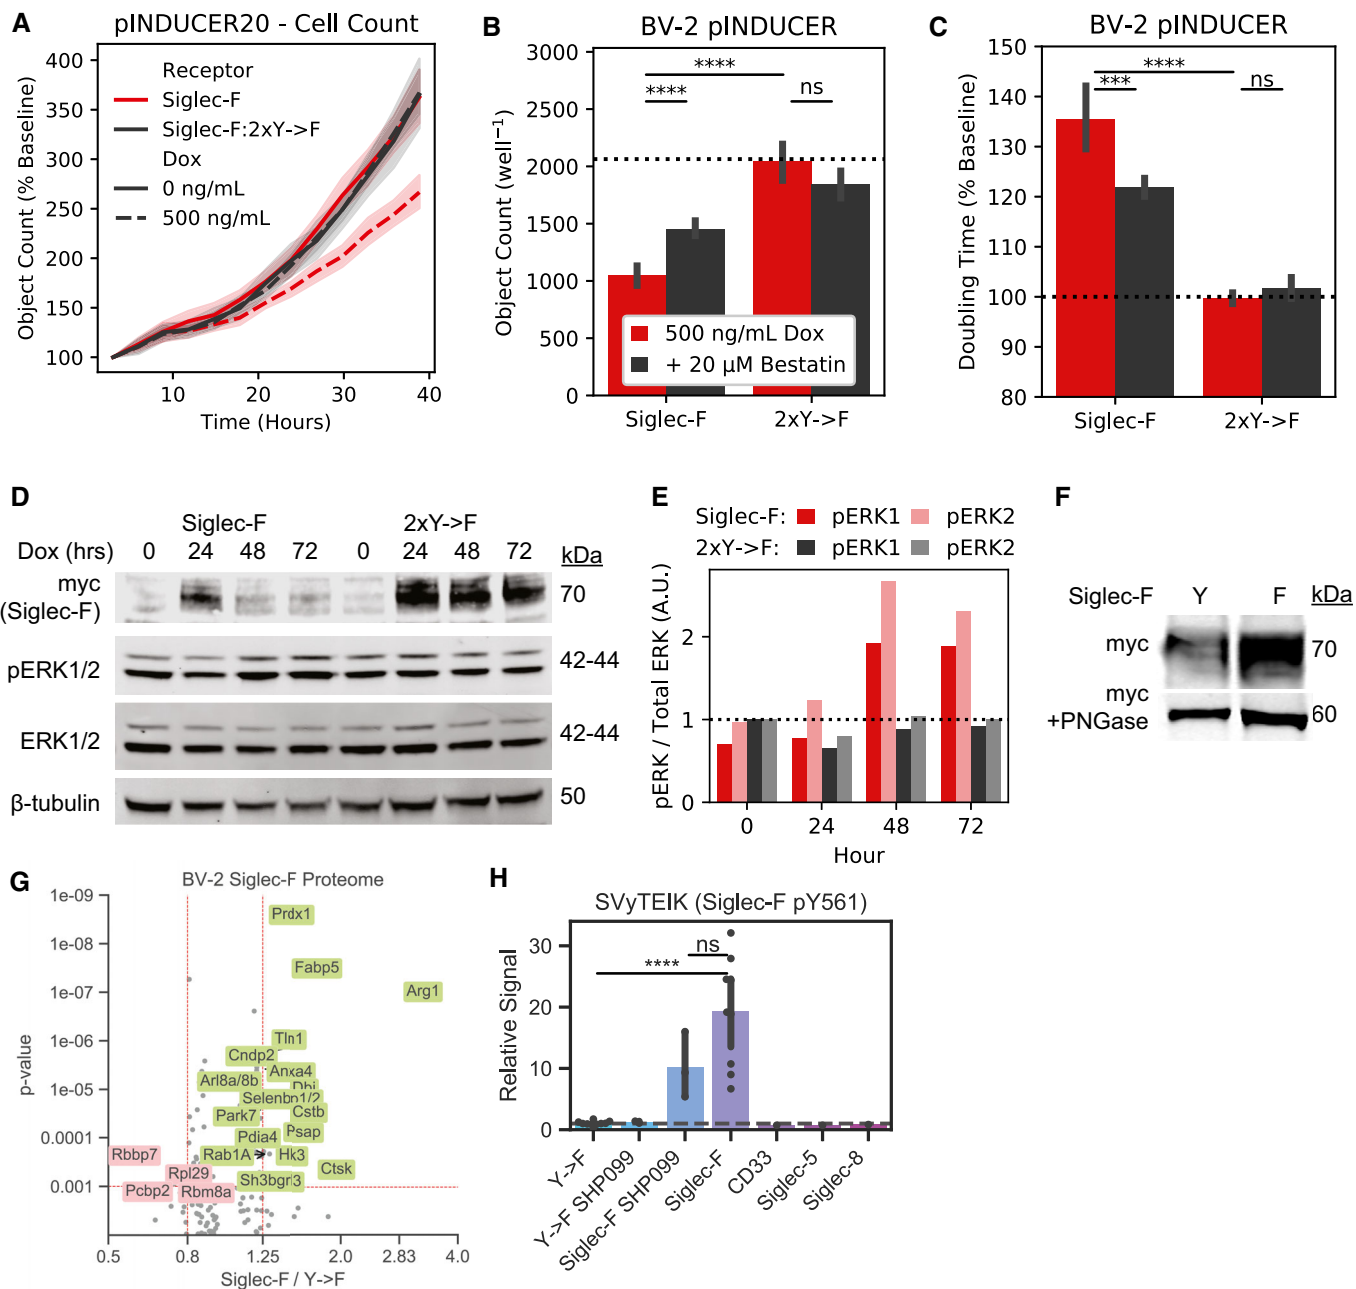

**Figure EV8. BV-2 Siglec expression accessory data.**

- A** Incucyte object count for BV-2 cells expressing inducible Siglec-F constructs. Cell counts for are normalized to the starting count in each imaging region.
- B, C** Incucyte quantification of (B) object count and (C) confluency doubling time for BV-2 cells expressing inducible Siglec-F and optionally co-treated with 20 μM Bestatin.
- D** Western blot detection of Siglec-F-myc, pERK1/2, total ERK, and β-tubulin in BV-2 cells induced to express Siglec-F for 0–72 h.
- E** Quantification of Erk1, Erk2, pErk1 / total Erk1, and pErk2 / total Erk2 for bands shown in (D).
- F** Western blot detection of myc-tagged Siglec-F +/- PNGase.
- G** Volcano plot showing proteomic changes induced by stable Siglec-F expression in BV-2 cells. Only proteins with ≥ 2 unique peptides that each were seen in ≥ 2 scans are shown.
- H** Quantification of Siglec-F pY561 (SVyTEIK) across BV-2 lines analyzed.
